# Supplementary material for: The purinergic receptor P2RX7 directs metabolic fitness of long-lived memory CD8+ T cells
Source: Springer Nature journal article supplement (doi:10.1038/s41586-018-0282-0), 2018-07-03

In the format provided by the authors and unedited.

# The purinergic receptor P2RX7 directs metabolic fitness of long-lived memory CD8<sup>+</sup> T cells

Henrique Borges da Silva<sup>1,2</sup>, Lalit K. Beura<sup>1,3</sup>, Haiguang Wang<sup>1,2</sup>, Eric A. Hanse<sup>1,2</sup>, Reshma Gore<sup>4</sup>, Milcah C. Scott<sup>1,3</sup>, Daniel A. Walsh<sup>1,2</sup>, Katharine E. Block<sup>1,2</sup>, Raissa Fonseca<sup>1,3</sup>, Yan Yan<sup>1,2</sup>, Keli L. Hippen<sup>1,5</sup>, Bruce R. Blazar<sup>1,5</sup>, David Masopust<sup>1,3</sup>, Ameeta Kelekar<sup>1,2</sup>, Lucy Vulchanova<sup>4</sup>, Kristin A. Hogquist<sup>1,2</sup> & Stephen C. Jameson<sup>1,2\*</sup>

<sup>1</sup>Center for Immunology, University of Minnesota, Minneapolis, MN, USA. <sup>2</sup>Department of Laboratory Medicine and Pathology, University of Minnesota, Minneapolis, MN, USA. <sup>3</sup>Department of Microbiology and Immunology, University of Minnesota, Minneapolis, MN, USA. <sup>4</sup>Department of Neuroscience, University of Minnesota, Minneapolis, MN, USA. <sup>5</sup>Department of Pediatrics, University of Minnesota, Minneapolis, MN, USA. \*e-mail: james024@umn.edu

## Supplementary Figures

### Supplementary Figure 1.

**Original Western blot gel image.** This is the source data for the image shown in Extended Data Fig. 6e, which comprise the set of lanes on the left. The lanes on the right comprised of a partial replicate (WT samples only). The position of molecular weight markers is indicated, and two are labeled indicating 37 and 50kD – the other markers are, in ascending order, 75, 100, 150 and 250kD.

### Supplementary Figure 2.

**Representative flow cytometry gating strategy.** Most of the images are from a sample of splenocytes from animals cotransferred with WT and *P2rx7<sup>-/-</sup>* P14 cells and infected with LCMV. The sequential gating represents (clockwise from upper left): FSC (size) vs SSC (granularity) → singlet events → CD8+ve vs “Dump”-ve → LCMV gp33/D<sup>b</sup> tetramer +ve → CD45.1 vs CD45.2 congenic markers → CD44hi vs CD62Lhi. The center image is from a sample of small intestine IEL, chosen to indicate a typical profile for intravascular staining: axes are intravascular [i.v.] CD8 staining vs *in vitro* CD8 staining.

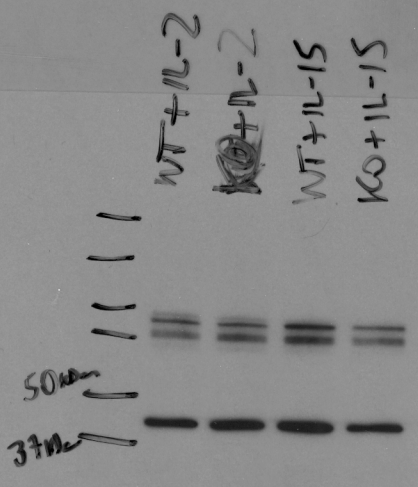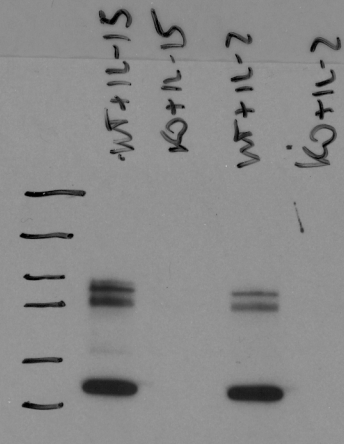

Opa1  
beta-actin

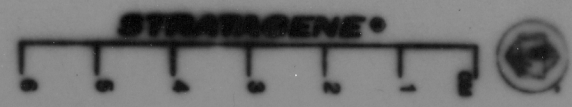

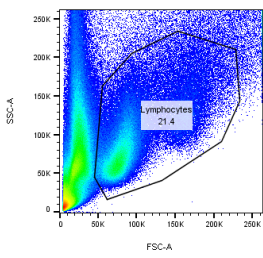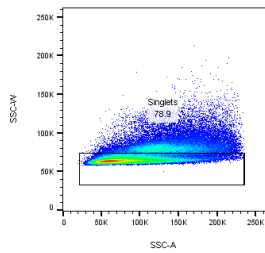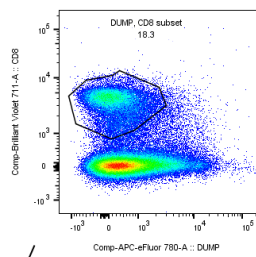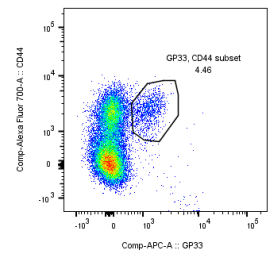

To define tissue-resident  
 (CD8 i.v.-) cells

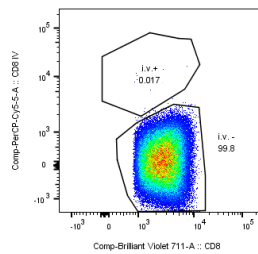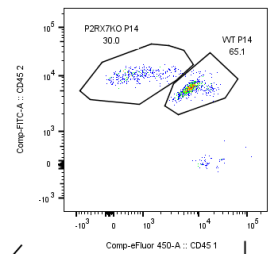

P2RX7KO P14

WT P14

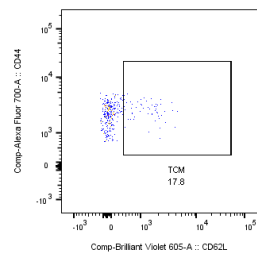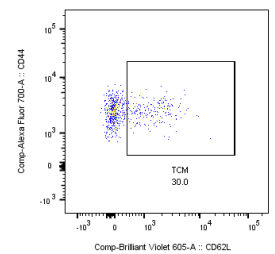

Supplement: 41586_2018_282_MOESM1_ESM.pdf [file 41586_2018_282_MOESM1_ESM.pdf]
